# Supplementary material for: Translation of the quality-of-life measure for adults with primary ciliary dyskinesia and its application in patients in Brazil
Source: PubMed Central journal article supplement — J Bras Pneumol. 2019 May-Jun;45(3):e20170358. doi: 10.1590/1806-3713/e20170358 (PMC6715036; doi:10.1590/1806-3713/e20170358), 2019
Supplement: 1806-3713-jbpneu-45-03-e20170358-app1.pdf [file 1806-3713-jbpneu-45-03-e20170358-app1.pdf]

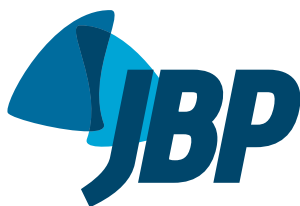

# QDV-DCP QUESTIONÁRIO Adultos com 18 anos ou mais

QOL-PCD Adult Version 2; March 2016 | ©2015 Lucas, Leigh & Quittner

Compreender o impacto da sua doença e dos seus tratamentos no seu dia a dia pode ajudar a equipe de saúde que cuida de você a manter o controle da sua saúde e ajustar os seus tratamentos. Por esse motivo, esse questionário foi especificamente desenvolvido para pessoas que tem Discinesia Ciliar Primária (DCP). Obrigada pela sua boa vontade em completar esse questionário!

## INSTRUÇÕES PARA PREENCHIMENTO DESSE QUESTIONÁRIO:

As questões seguintes são sobre o seu atual estado de saúde, da forma como você o percebe. Essas informações nos permitirão compreender melhor como você se sente no seu dia a dia. Por favor, responda todas as questões. **Não** existem questões certas ou erradas! Se você não tiver certeza sobre como responder, escolha a resposta que parecer mais próxima da sua situação.

## NOTAS PARA MÉDICOS E PESQUISADORES:

Esse questionário pode ser utilizado apenas em acordo com aqueles que o desenvolveram. Estes requerem que todos os dados gerados pelo uso do questionário contribuam para a posterior validação desse instrumento. Dados relativos a esse questionário não podem ser publicados de nenhuma forma até que seus idealizadores publiquem os resultados do estudo de validação.

Para mais detalhes e permissões por favor contatar: na América do Norte: Prof Quittner aquittner@miami.edu. Na Europa e outras regiões fora da América do Norte: Dra Jane Lucas jlucas1@soton.ac.uk.

## SEÇÃO I. QUALIDADE DE VIDA

Por favor, escolha o quadrado correspondente à sua resposta.

| <i>Durante a última semana, o quanto você teve dificuldade em:</i>                                             | Muita dificuldade        | Alguma dificuldade       | Pouca dificuldade        | Nenhuma dificuldade      |
|----------------------------------------------------------------------------------------------------------------|--------------------------|--------------------------|--------------------------|--------------------------|
| 1. Realizar atividades mais cansativas (por exemplo, atividade física, praticar algum esporte, arrumar a casa) | <input type="checkbox"/> | <input type="checkbox"/> | <input type="checkbox"/> | <input type="checkbox"/> |
| 2. Andar tão rápido quanto as outras pessoas                                                                   | <input type="checkbox"/> | <input type="checkbox"/> | <input type="checkbox"/> | <input type="checkbox"/> |
| 3. Subir mais do que um lance de escada                                                                        | <input type="checkbox"/> | <input type="checkbox"/> | <input type="checkbox"/> | <input type="checkbox"/> |
| 4. Carregar coisas pesadas, como livros ou sacolas de compras                                                  | <input type="checkbox"/> | <input type="checkbox"/> | <input type="checkbox"/> | <input type="checkbox"/> |

| <i>Durante a última semana, indique com que frequência:</i> | Sempre                   | Frequentemente           | Às vezes                 | Nunca                    |
|-------------------------------------------------------------|--------------------------|--------------------------|--------------------------|--------------------------|
| 5. Você se sentiu cansado (a)                               | <input type="checkbox"/> | <input type="checkbox"/> | <input type="checkbox"/> | <input type="checkbox"/> |
| 6. Você se sentiu preocupado (a)                            | <input type="checkbox"/> | <input type="checkbox"/> | <input type="checkbox"/> | <input type="checkbox"/> |
| 7. Você se sentiu cheio (a) de energia                      | <input type="checkbox"/> | <input type="checkbox"/> | <input type="checkbox"/> | <input type="checkbox"/> |
| 8. Você se sentiu exausto (a)                               | <input type="checkbox"/> | <input type="checkbox"/> | <input type="checkbox"/> | <input type="checkbox"/> |
| 9. Você se sentiu triste                                    | <input type="checkbox"/> | <input type="checkbox"/> | <input type="checkbox"/> | <input type="checkbox"/> |
| 10. Você se sentiu deprimido (a)                            | <input type="checkbox"/> | <input type="checkbox"/> | <input type="checkbox"/> | <input type="checkbox"/> |

Por favor, escolha o quadrado correspondente à sua resposta.

Atualmente você está fazendo algum tipo de tratamento (medicação oral ou inalatória e ou fisioterapia)?

Sim  Não (pular para questão 15)

Durante a última semana, indique:

11. Atualmente, quanto tempo por dia você gasta fazendo o seu tratamento para discinesia ciliar primária (por exemplo, medicações ou fisioterapia)?

- Muito tempo  
 Um tempo razoável  
 Pouco tempo  
 Quase nenhum tempo

| <i>Durante a última semana, indique o quanto:</i>                                                            | Nem um pouco             | Um pouco                 | Moderadamente            | Muito                    |
|--------------------------------------------------------------------------------------------------------------|--------------------------|--------------------------|--------------------------|--------------------------|
| 12. Seus tratamentos para DCP (por exemplo, medicações ou fisioterapia) fizeram o seu dia a dia mais difícil | <input type="checkbox"/> | <input type="checkbox"/> | <input type="checkbox"/> | <input type="checkbox"/> |
| 13. Foi difícil para você incluir os seus tratamentos para DCP em cada dia                                   | <input type="checkbox"/> | <input type="checkbox"/> | <input type="checkbox"/> | <input type="checkbox"/> |
| 14. A fisioterapia fez você se sentir cansado rapidamente                                                    | <input type="checkbox"/> | <input type="checkbox"/> | <input type="checkbox"/> | <input type="checkbox"/> |

| <i>Pensando sobre a sua saúde na última semana, indique o quanto cada uma das frases abaixo é verdadeira ou falsa para você.</i>           | Totalmente verdadeiro    | Parcialmente verdadeiro  | Um pouco verdadeiro      | Nem um pouco verdade     |                          |
|--------------------------------------------------------------------------------------------------------------------------------------------|--------------------------|--------------------------|--------------------------|--------------------------|--------------------------|
| 15. Eu me sinto confortável ao tossir na frente de outras pessoas                                                                          | <input type="checkbox"/> | <input type="checkbox"/> | <input type="checkbox"/> | <input type="checkbox"/> |                          |
| 16. Eu me sinto preocupado de estar em contato com pessoas que estão doentes                                                               | <input type="checkbox"/> | <input type="checkbox"/> | <input type="checkbox"/> | <input type="checkbox"/> |                          |
| 17. Eu me sinto sozinho (a)                                                                                                                | <input type="checkbox"/> | <input type="checkbox"/> | <input type="checkbox"/> | <input type="checkbox"/> |                          |
| 18. Eu me sinto confortável assoando o meu nariz na frente de outras pessoas                                                               | <input type="checkbox"/> | <input type="checkbox"/> | <input type="checkbox"/> | <input type="checkbox"/> | Não se Aplica            |
| 19. Eu me sinto confortável em fazer os meus tratamentos (por exemplo, tomar medicações ou fazer fisioterapia) na frente de outras pessoas | <input type="checkbox"/> |

## SEÇÃO II. ESCOLA, TRABALHO OU ATIVIDADES DIÁRIAS

Durante a última semana:

20. O quanto você teve problema para se manter em dia no trabalho, nas atividades de casa ou em outras atividades diárias?

- Você não teve nenhum problema para se manter em dia nessas atividades.  
 Você conseguiu se manter em dia, mas tem sido difícil.  
 Você não se manteve em dia.  
 Você não tem conseguido realizar essas atividades.

21. O quanto você acha que ter DCP atrapalha seus objetivos no trabalho, nas atividades de casa, familiares ou pessoais?

- Muito    Mais ou menos    Um pouco    Nem um pouco

| <i>Pensando sobre a sua saúde durante a última semana, indique o quanto cada uma dessas frases é verdadeira ou falsa para você:</i> | Totalmente verdadeiro    | Parcialmente verdadeiro  | Um pouco verdadeiro      | Nem um pouco verdade     |
|-------------------------------------------------------------------------------------------------------------------------------------|--------------------------|--------------------------|--------------------------|--------------------------|
| 22. É difícil fazer planos para o futuro (por exemplo, mudar de trabalho ou conseguir um trabalho; constituir uma família etc)      | <input type="checkbox"/> | <input type="checkbox"/> | <input type="checkbox"/> | <input type="checkbox"/> |
| 23. Eu levo uma vida normal                                                                                                         | <input type="checkbox"/> | <input type="checkbox"/> | <input type="checkbox"/> | <input type="checkbox"/> |
| 24. Eu estou preocupado (a) de que a minha saúde vai ficar pior                                                                     | <input type="checkbox"/> | <input type="checkbox"/> | <input type="checkbox"/> | <input type="checkbox"/> |
| 25. Eu me sinto saudável                                                                                                            | <input type="checkbox"/> | <input type="checkbox"/> | <input type="checkbox"/> | <input type="checkbox"/> |
| 26. Eu sou capaz de administrar os meus tratamentos (por exemplo, tomar medicações ou fazer fisioterapia) para DCP diariamente      | <input type="checkbox"/> | <input type="checkbox"/> | <input type="checkbox"/> | <input type="checkbox"/> |

Por favor, marque o quadrado correspondente à sua resposta.

Durante a última semana:

27. Como você acha que a sua saúde esta agora?

- Excelente
- Boa
- Razoável
- Ruim

### SEÇÃO III. SINTOMAS

Por favor, marque o quadrado que indique sua resposta.

| <i>Indique como você se sentiu na última semana.</i>                                                                  | Muito                    | Mais ou menos            | Um pouco                 | Nem um pouco             |
|-----------------------------------------------------------------------------------------------------------------------|--------------------------|--------------------------|--------------------------|--------------------------|
| 28. Você se sentiu com o peito cheio de catarro                                                                       | <input type="checkbox"/> | <input type="checkbox"/> | <input type="checkbox"/> | <input type="checkbox"/> |
| 29. Você teve dificuldade para ouvir (se você usa aparelho auditivo: você teve dificuldade para ouvir sem o aparelho) | <input type="checkbox"/> | <input type="checkbox"/> | <input type="checkbox"/> | <input type="checkbox"/> |
| 30. Você teve gotejamento pós-nasal (sentiu líquido pingando na garganta)                                             | <input type="checkbox"/> | <input type="checkbox"/> | <input type="checkbox"/> | <input type="checkbox"/> |
| 31. Você teve “dor de sinusite” (na testa ou perto dos olhos)                                                         | <input type="checkbox"/> | <input type="checkbox"/> | <input type="checkbox"/> | <input type="checkbox"/> |
| 32. Você sentiu aperto no peito                                                                                       | <input type="checkbox"/> | <input type="checkbox"/> | <input type="checkbox"/> | <input type="checkbox"/> |
| 33. Você teve que colocar catarro para fora                                                                           | <input type="checkbox"/> | <input type="checkbox"/> | <input type="checkbox"/> | <input type="checkbox"/> |

**Se 'Nem um pouco', vá para a questão 35**

Durante a última semana:

34. O seu muco foi predominantemente:

- Transparente
- Esverdeado
- Transparente a amarelo
- Verde com traços de sangue
- Amarelado-verde
- Não sei

| <i>Durante a última semana, indique com que frequência:</i>                                                                              | Sempre                   | Frequentemente           | Às vezes                 | Nunca                    |
|------------------------------------------------------------------------------------------------------------------------------------------|--------------------------|--------------------------|--------------------------|--------------------------|
| 35. Você teve falta de ar enquanto fazia atividades maiores que habituais (por exemplo, arrumando a casa ou praticando atividade física) | <input type="checkbox"/> | <input type="checkbox"/> | <input type="checkbox"/> | <input type="checkbox"/> |
| 36. Você teve chiado ou piado no peito                                                                                                   | <input type="checkbox"/> | <input type="checkbox"/> | <input type="checkbox"/> | <input type="checkbox"/> |
| 37. Seu nariz ficou escorrendo                                                                                                           | <input type="checkbox"/> | <input type="checkbox"/> | <input type="checkbox"/> | <input type="checkbox"/> |

| <i>Durante a última semana, indique com que frequência:</i> | Sempre                   | Frequentemente           | Às vezes                 | Nunca                    |
|-------------------------------------------------------------|--------------------------|--------------------------|--------------------------|--------------------------|
| 38. Você teve falta de ar enquanto falava                   | <input type="checkbox"/> | <input type="checkbox"/> | <input type="checkbox"/> | <input type="checkbox"/> |
| 39. Você ficou com os ouvidos entupidos                     | <input type="checkbox"/> | <input type="checkbox"/> | <input type="checkbox"/> | <input type="checkbox"/> |
| 40. Você ficou com o nariz entupido                         | <input type="checkbox"/> | <input type="checkbox"/> | <input type="checkbox"/> | <input type="checkbox"/> |

Por favor, certifique-se de que respondeu todas as questões.

OBRIGADO.
